# Supplementary material for: System for Stable β-Estradiol-Inducible Gene Expression in the Moss Physcomitrella patens
Source: PubMed Central journal article supplement (PMC3785464; doi:10.1371/journal.pone.0077356), 2013-09-27
Supplement: pone.0077356.s010.pdf [file pone.0077356.s010.pdf]

**Table S1. Primers for cloning of GX promoter regions.**

| Promoter region |         | Sequence (5' to 3')          |
|-----------------|---------|------------------------------|
| PGX6            | Forward | TCATTGTTCTTCATTGTTTTCTATCA   |
|                 | Reverse | TTCGCCTCCACTCGAAACTCCA       |
| PGX8            | Forward | TTTTGTTTGAGGAGGTTTTACTTTTTTG |
|                 | Reverse | CGCACCCGACGGCTCTGTTTA        |
