# Supplementary material for: System for Stable β-Estradiol-Inducible Gene Expression in the Moss Physcomitrella patens
Source: PubMed Central journal article supplement (PMC3785464; doi:10.1371/journal.pone.0077356), 2013-09-27
Supplement: pone.0077356.s011.pdf [file pone.0077356.s011.pdf]

**Table S2. Primers for qPCR.**

| Target gene   |         | Sequences (5' to 3')   |
|---------------|---------|------------------------|
| <i>NGG</i>    | Forward | GTCCGCCCTGAGCAAAGA     |
|               | Reverse | TCCAGCAGGACCATGTGATC   |
| <i>PpTUA1</i> | Forward | CGTAGGAGGGACCAGTTTGG   |
|               | Reverse | TGCATTCATCCCCGAGTCA    |
| <i>NmRFPI</i> | Forward | CGAGGTCAAGACCACCTACATG |
|               | Reverse | TGGGAGGTGATGTCCAGCTT   |
